# Supplementary material for: LC–ESI–FT–MSn Metabolite Profiling of Symphytum officinale L. Roots Leads to Isolation of Comfreyn A, an Unusual Arylnaphthalene Lignan
Source: PubMed Central journal article supplement (PMC7370062; doi:10.3390/ijms21134671), 2020-06-30
Supplement: ijms-21-04671-s001.pdf [file ijms-21-04671-s001.pdf]

## Supplementary Materials

### **LC- ESI-FT-MS<sup>n</sup> metabolite profiling of *Symphytum officinale* L. roots leads to isolation of comfrey A, an unusual aryl naphthalene lignan**

Gilda D'Urso <sup>a,1</sup>, Milena Masullo <sup>a,1</sup>, Jacqueline Seigner <sup>b</sup>, Yvonne M. Holper-Schichl<sup>c</sup>, Rainer de Martin <sup>b</sup>, Alberto Plaza <sup>d,\*</sup>, Sonia Piacente <sup>a,\*</sup>

*<sup>a</sup>Dipartimento di Farmacia, Università degli Studi di Salerno, Via Giovanni Paolo II, 84084, Salerno, Italy*

*<sup>b</sup>Department of Vascular Biology, Medical University of Vienna, Austria*

*<sup>c</sup>The Procter & Gamble Company Wiedner Gürtel 13, 1100 Vienna, Austria*

*<sup>d</sup>R&D, P&G Health Germany GmbH, Alsfelder Str. 17, 64289 Darmstadt, Germany*

*<sup>1</sup>These authors contributed equally*

## List of Supplementary Materials

**Figure S1:** HPLC-UV profiles of the methanol and ethanol extracts at wavelength 280nm.

**Figure S2.**  $^1\text{H}$  NMR Spectrum (600 MHz,  $\text{CD}_3\text{OD}$ ) of compound **15**

**Figure S3.**  $^{13}\text{C}$  NMR Spectrum (600 MHz,  $\text{CD}_3\text{OD}$ ) of compound **15**

**Figure S4.** HSQC Spectrum ( $\text{CD}_3\text{OD}$ ) of compound **15**

**Figure S5.** HMBC Spectrum ( $\text{CD}_3\text{OD}$ ) of compound **15**

**Figure S6.** ROESY Spectrum ( $\text{CD}_3\text{OD}$ ) of compound **15**

**Figure S7.** Globoidnan B (**8**)

**Figure S8.**  $^1\text{H}$  NMR Spectrum (600 MHz,  $\text{CD}_3\text{OD}$ ) of compound **8**

**Figure S9.** HSQC Spectrum ( $\text{CD}_3\text{OD}$ ) of compound **8**

**Figure S10.** HMBC Spectrum ( $\text{CD}_3\text{OD}$ ) of compound **8**

**Figure S11.** Rabdosiin (**11**)

**Figure S12.**  $^1\text{H}$  NMR Spectrum (600 MHz,  $\text{CD}_3\text{OD}$ ) of compound **11**

**Figure S13.** HSQC Spectrum ( $\text{CD}_3\text{OD}$ ) of compound **11**

**Figure S14.** HMBC Spectrum ( $\text{CD}_3\text{OD}$ ) of compound **11**

**Figure S15.** Globoidnan A (**14**)

**Figure S16.**  $^1\text{H}$  NMR Spectrum (600 MHz,  $\text{CD}_3\text{OD}$ ) of compound **14**

**Figure S17.** HSQC Spectrum ( $\text{CD}_3\text{OD}$ ) of compound **14**

**Figure S18.** HMBC Spectrum ( $\text{CD}_3\text{OD}$ ) of compound **14**

**Table S1.**  $^{13}\text{C}$  and  $^1\text{H}$  NMR data ( $J$  in Hz) of compounds **8**, **11** and **14** (600 MHz,  $\delta$  ppm, in  $\text{CD}_3\text{OD}$ )

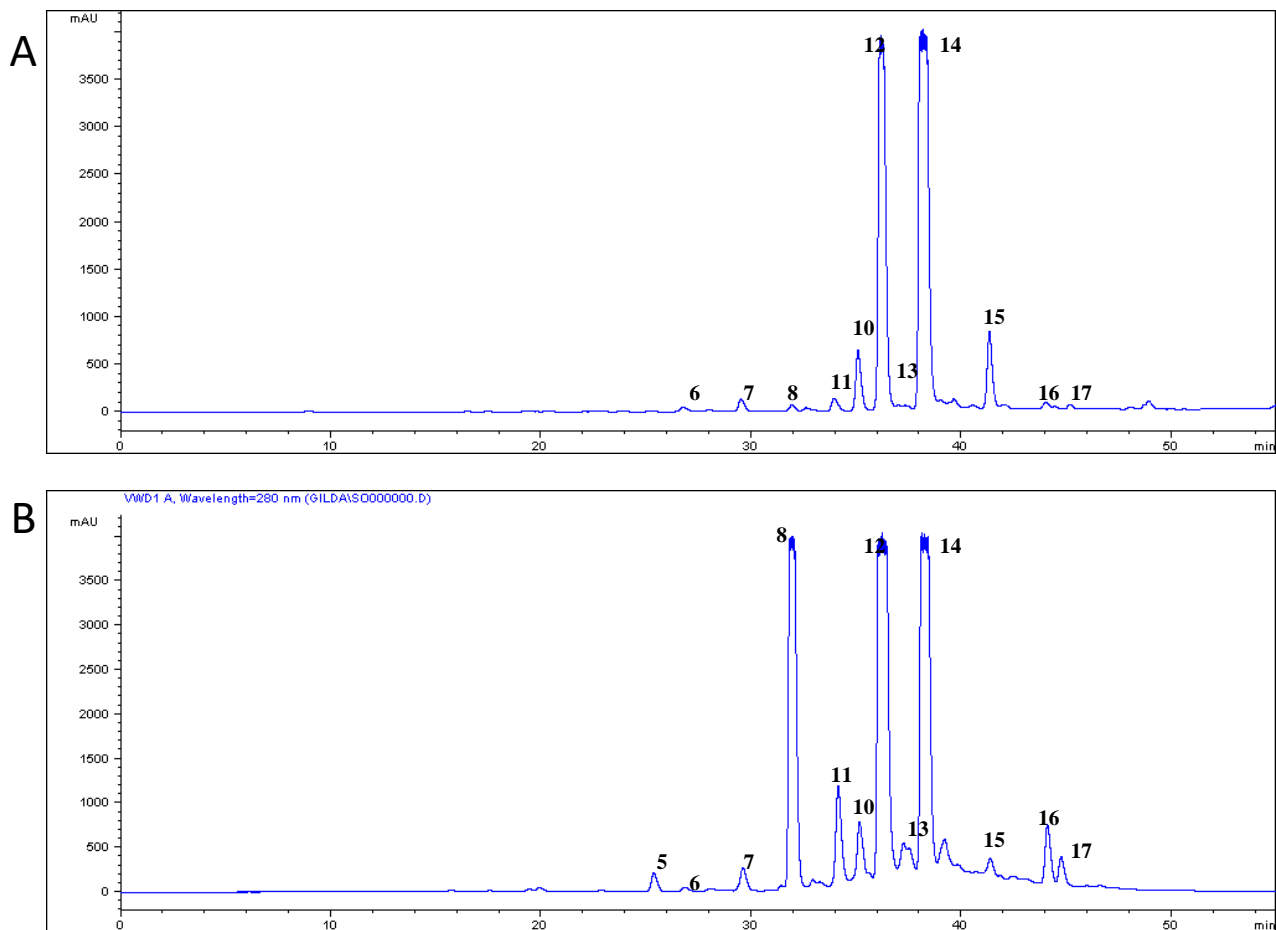

**Figure S1:** HPLC-UV profiles at wavelength 280 nm: A) methanol extract; B) ethanol extract. Only the highest peaks are numbered according to the corresponding compound identified by LC-ESI-MS and NMR analysis reported in Table 1. The HPLC-UV profiles together with LC-MS analysis confirmed that ethyl esters (**15**, **16** and **17**) are present in the plant and are not artifact.

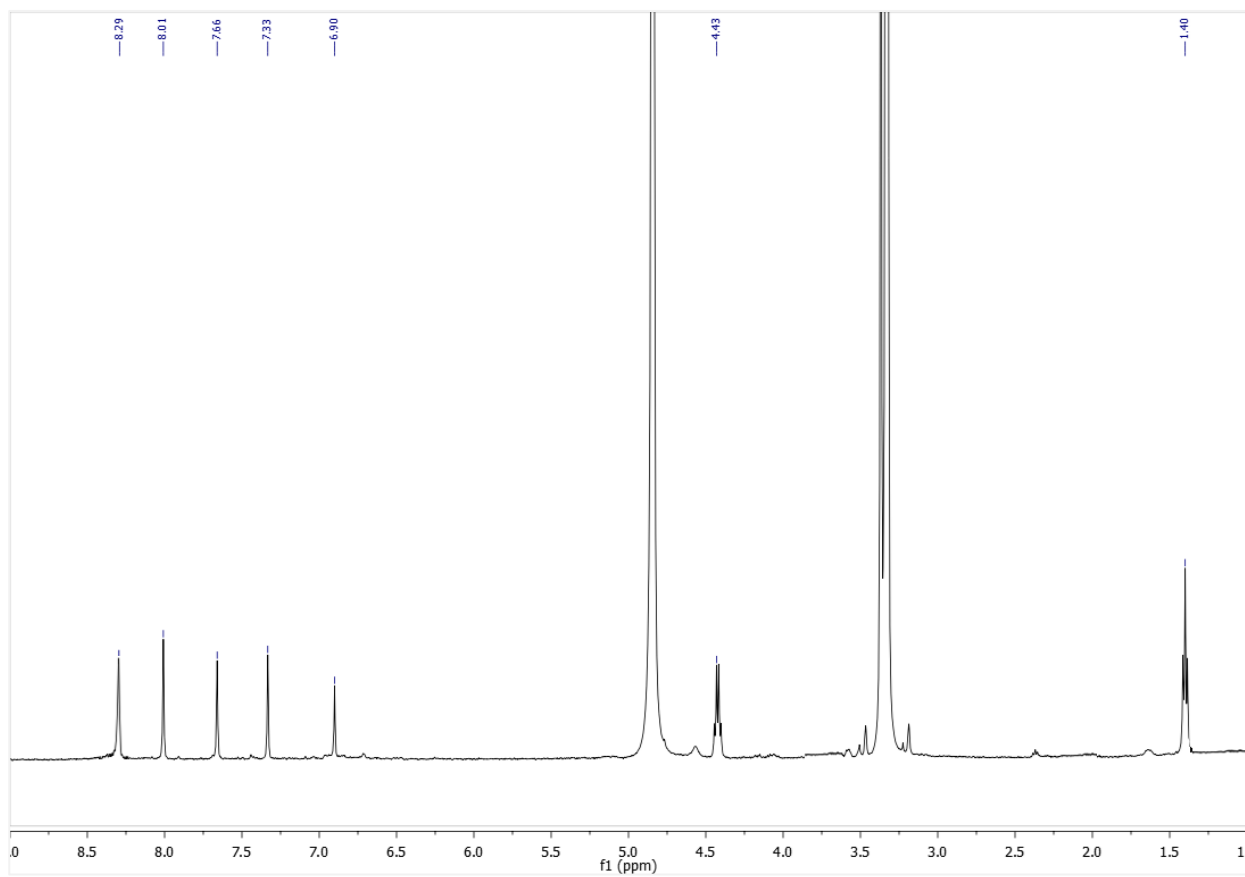

**Figure S2.**  $^1\text{H}$  NMR Spectrum (600 MHz,  $\text{CD}_3\text{OD}$ ) of compound **15**

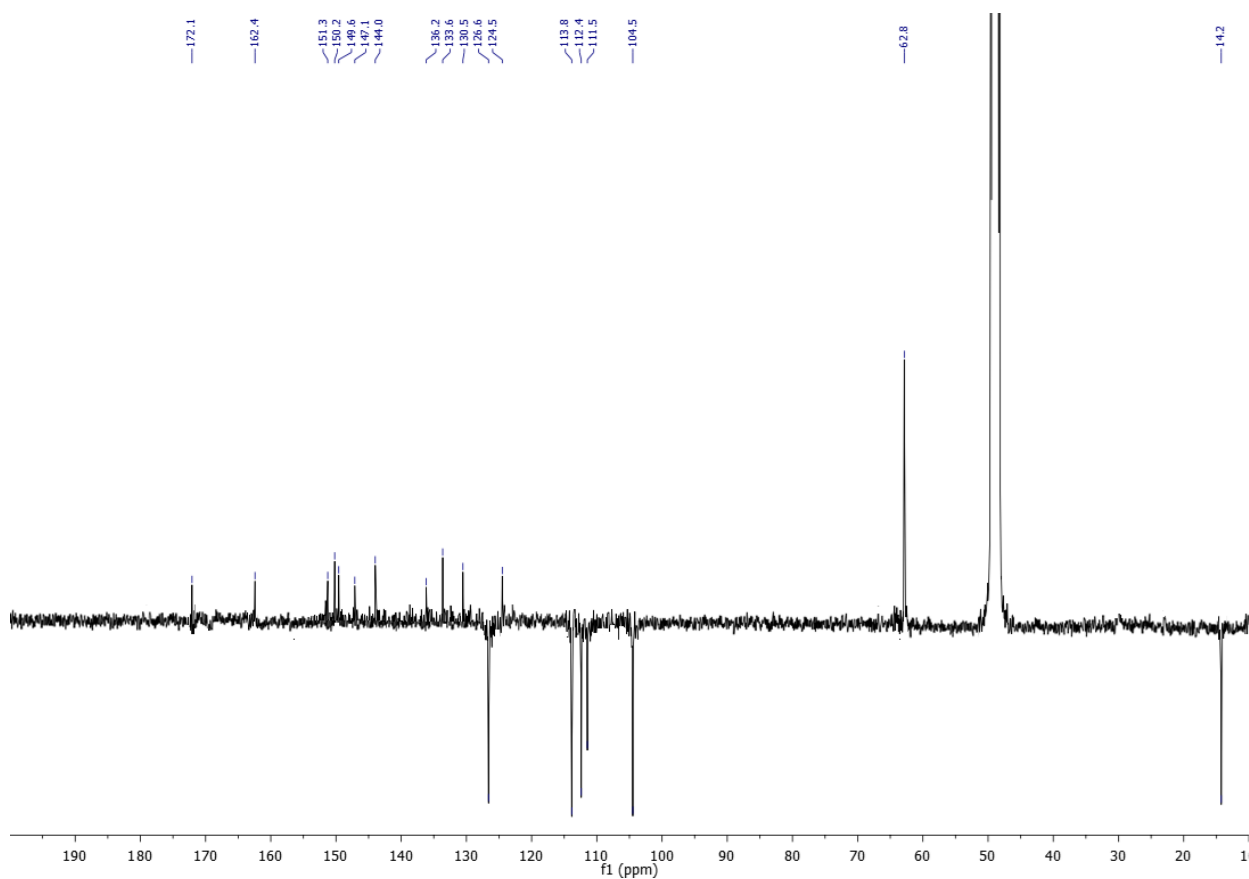

**Figure S3.**  $^{13}\text{C}$  NMR Spectrum (600 MHz,  $\text{CD}_3\text{OD}$ ) of compound **15**

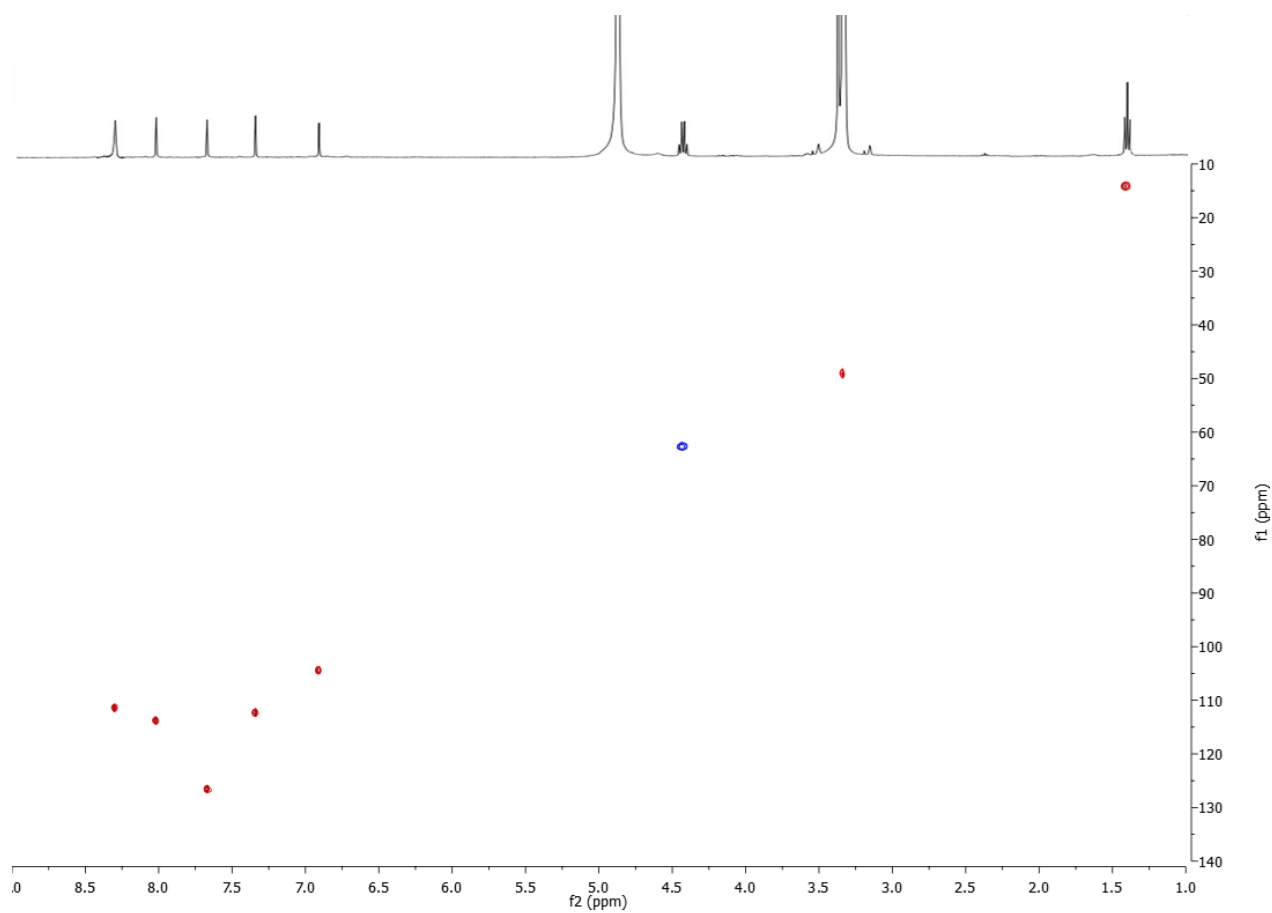

**Figure S4.** HSQC Spectrum (CD<sub>3</sub>OD) of compound **15**

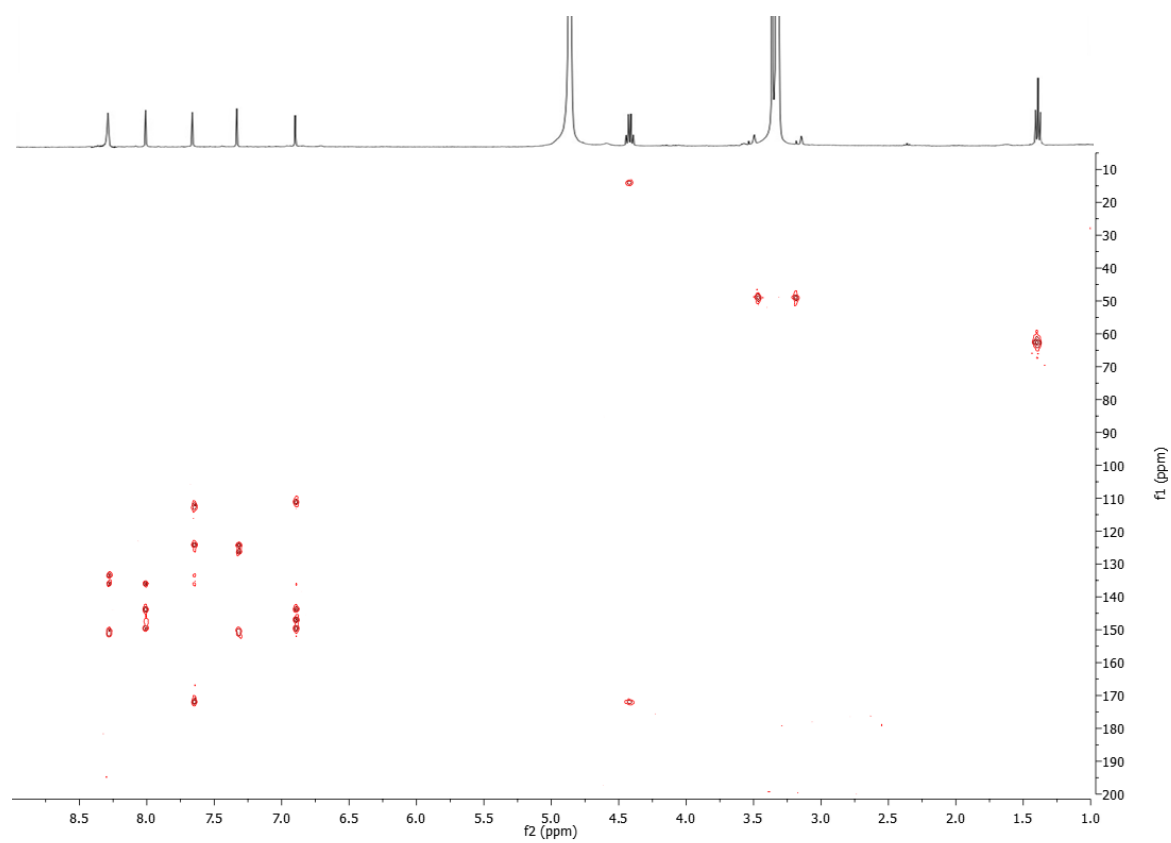

**Figure S5.** HMBC Spectrum (CD<sub>3</sub>OD) of compound **15**

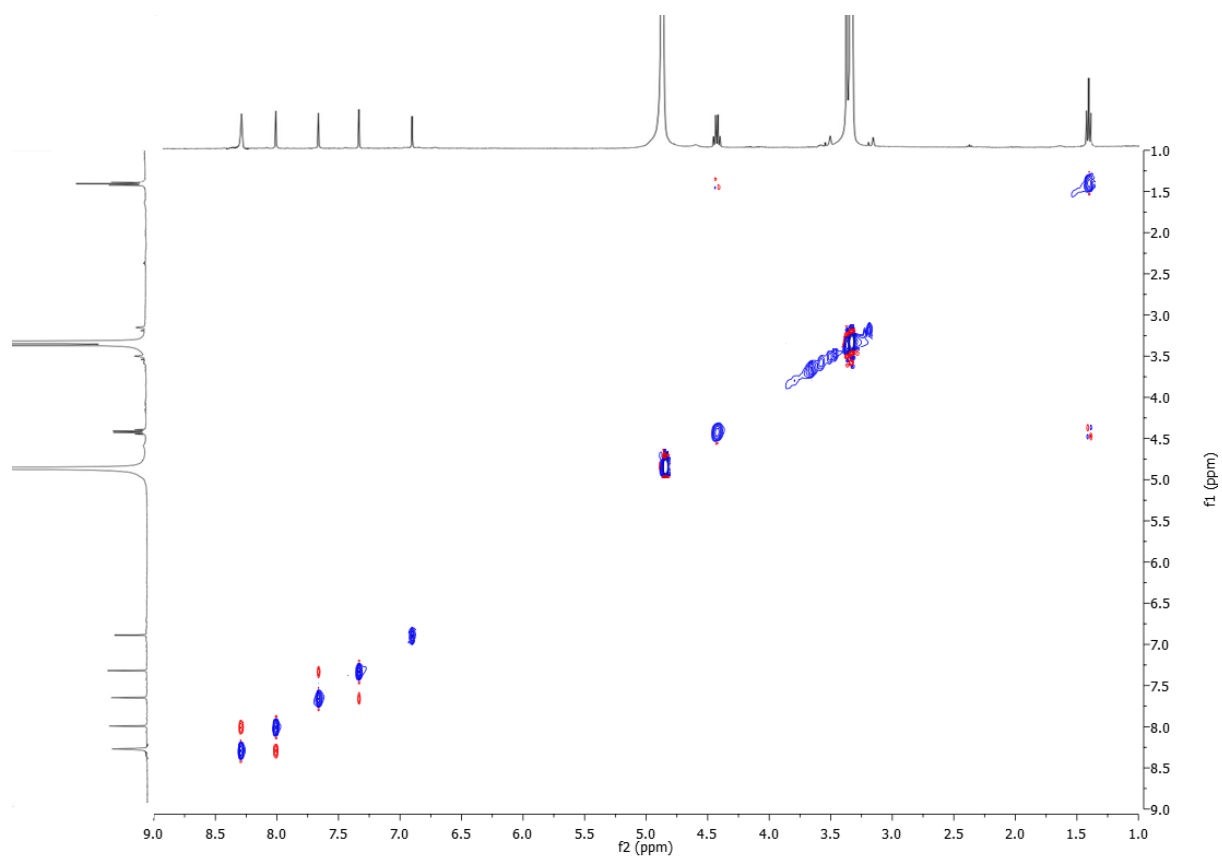

**Figure S6.** ROESY Spectrum ( $\text{CD}_3\text{OD}$ ) of compound **15**

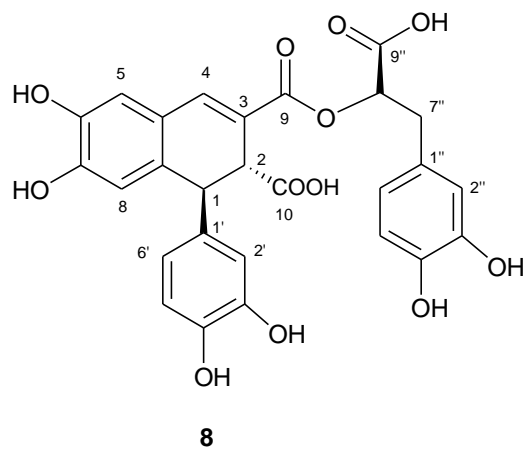

**Figure S7.** Globoidnan B (**8**)

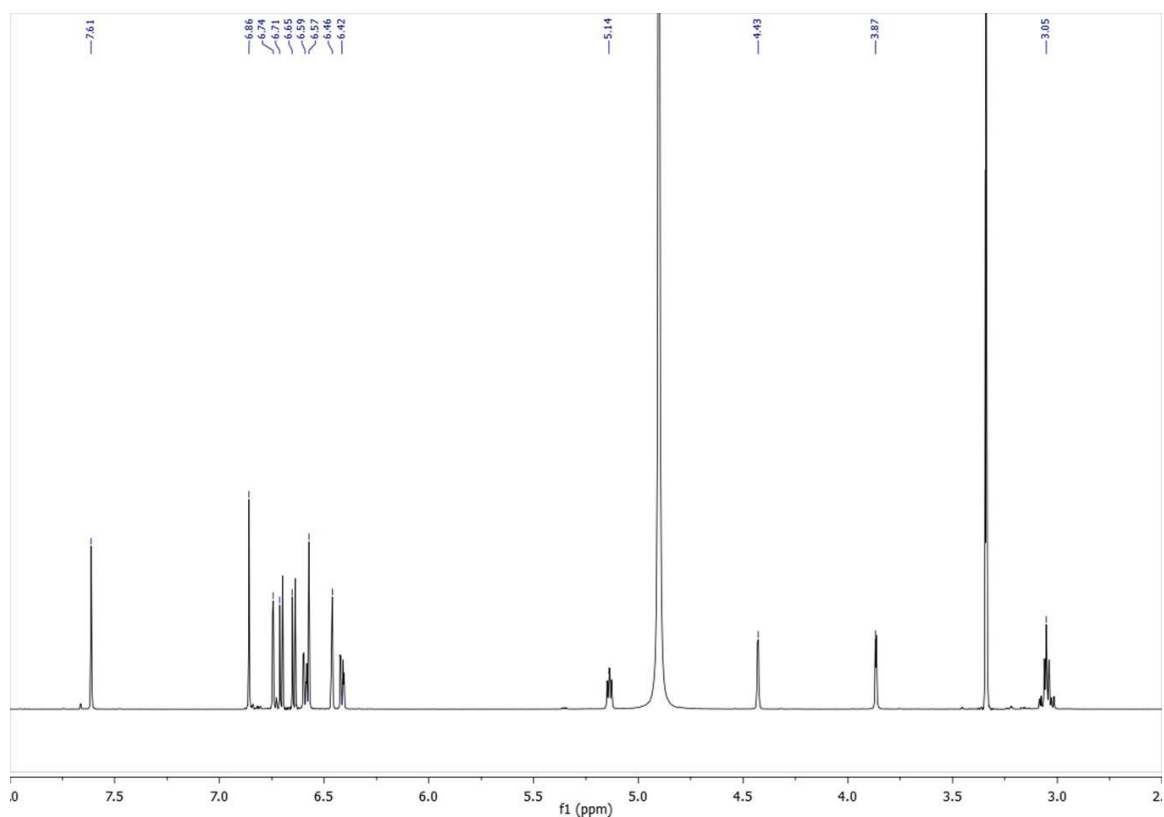

**Figure S8.**  $^1\text{H}$  NMR Spectrum (600 MHz,  $\text{CD}_3\text{OD}$ ) of compound **8**

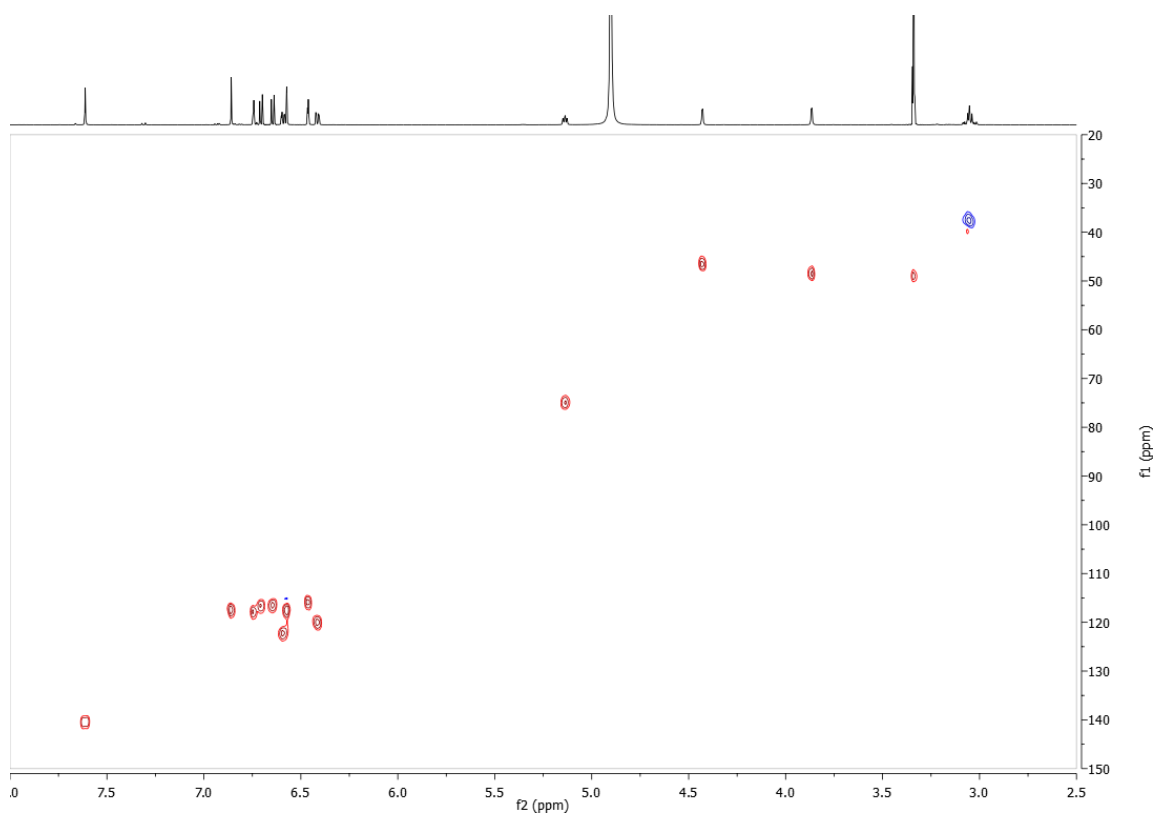

**Figure S9.** HSQC Spectrum ( $\text{CD}_3\text{OD}$ ) of compound **8**

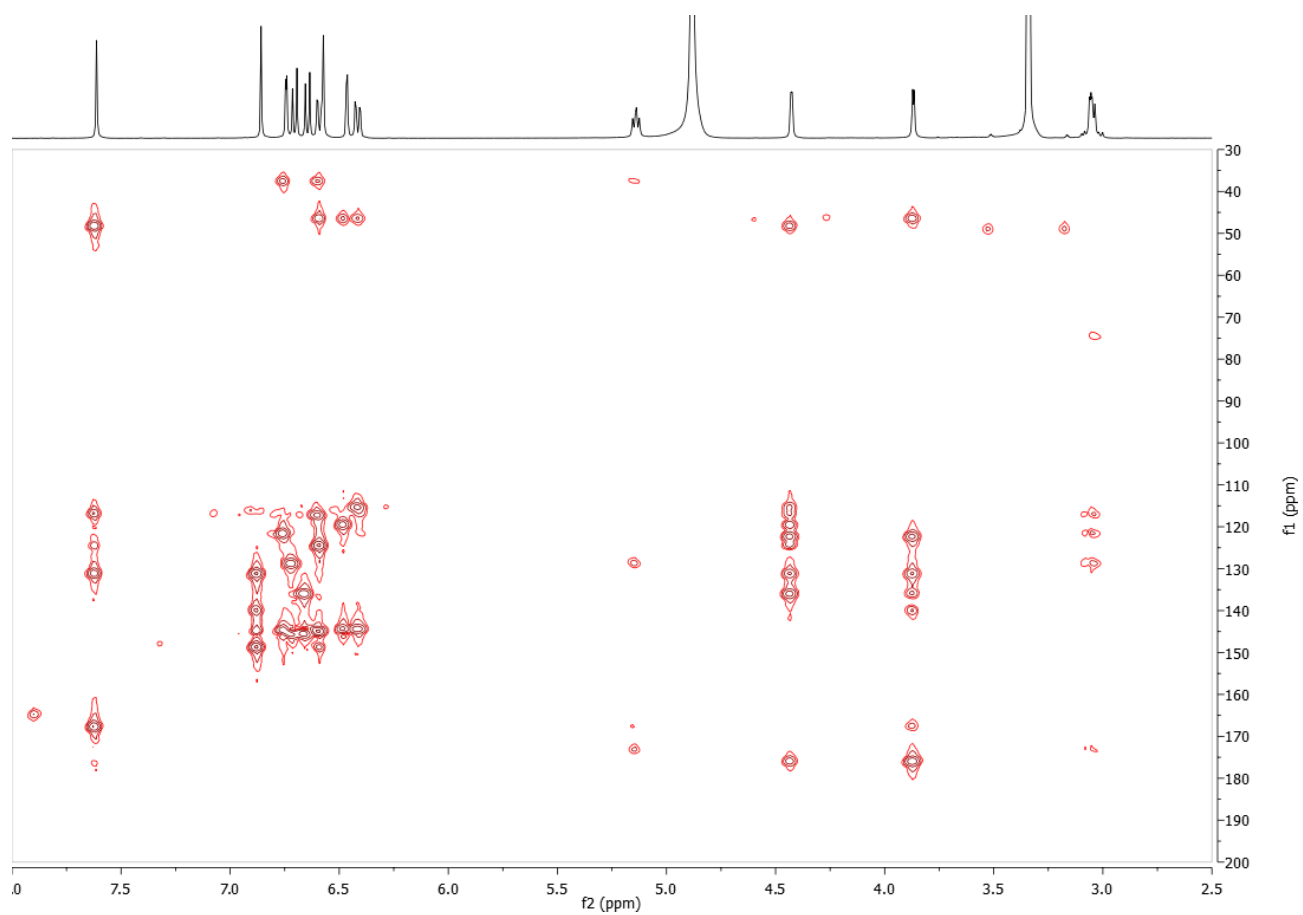

**Figure S10.** HMBC Spectrum (CD<sub>3</sub>OD) of compound **8**

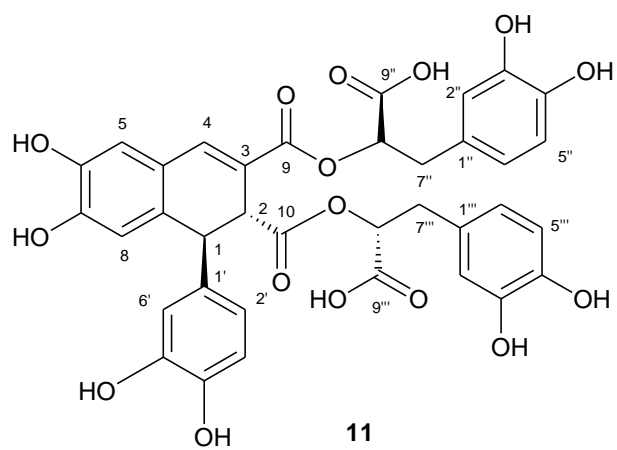

**Figure S11.** Rabdosiin (**11**)



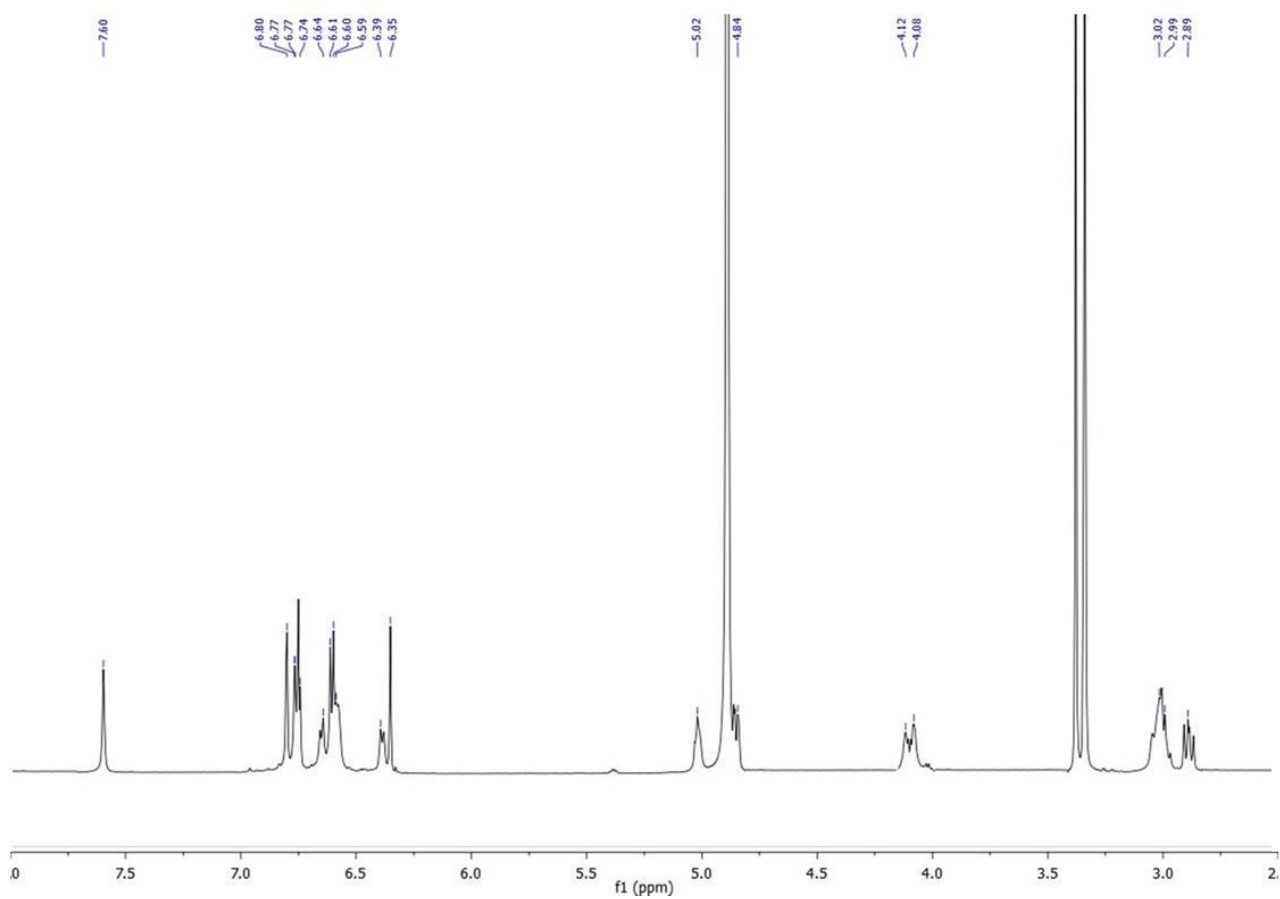

**Figure S12.**  $^1\text{H}$  NMR Spectrum (600 MHz,  $\text{CD}_3\text{OD}$ ) of compound **11**

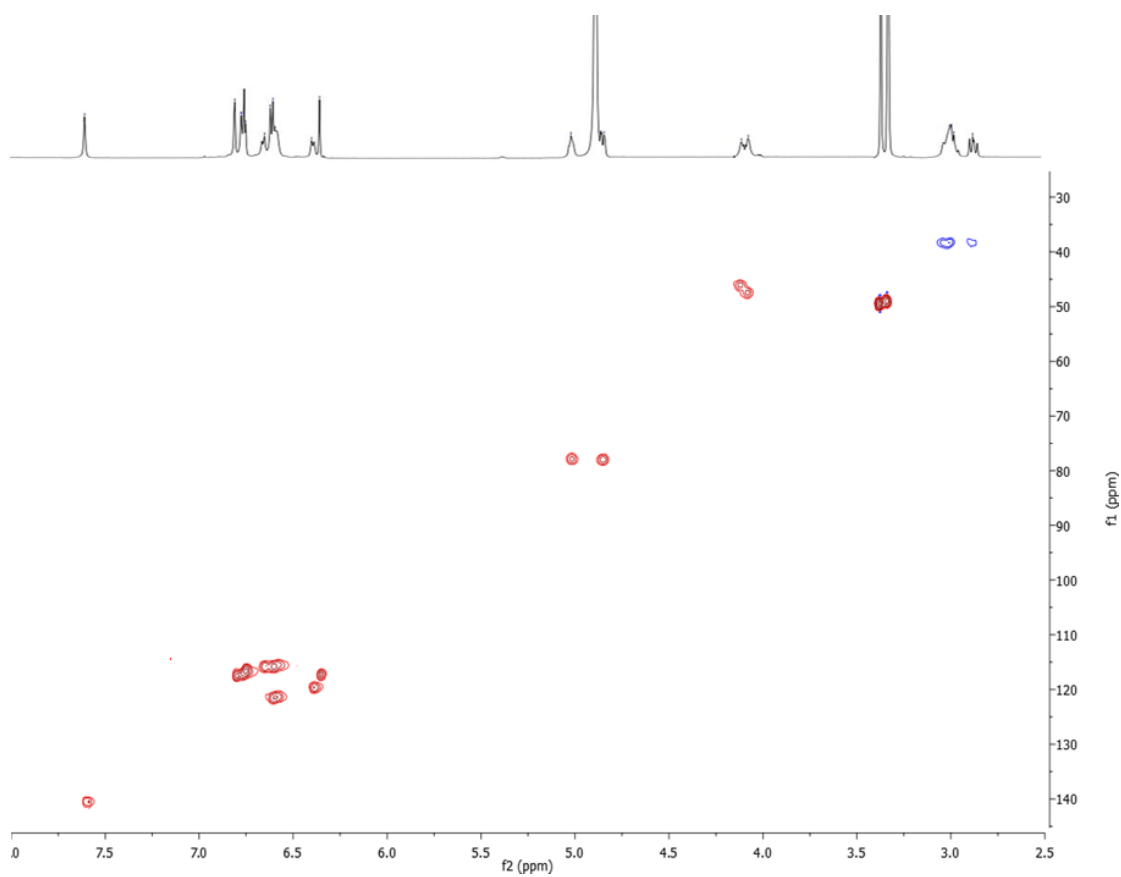

**Figure S13.** HSQC Spectrum ( $\text{CD}_3\text{OD}$ ) of compound **11**

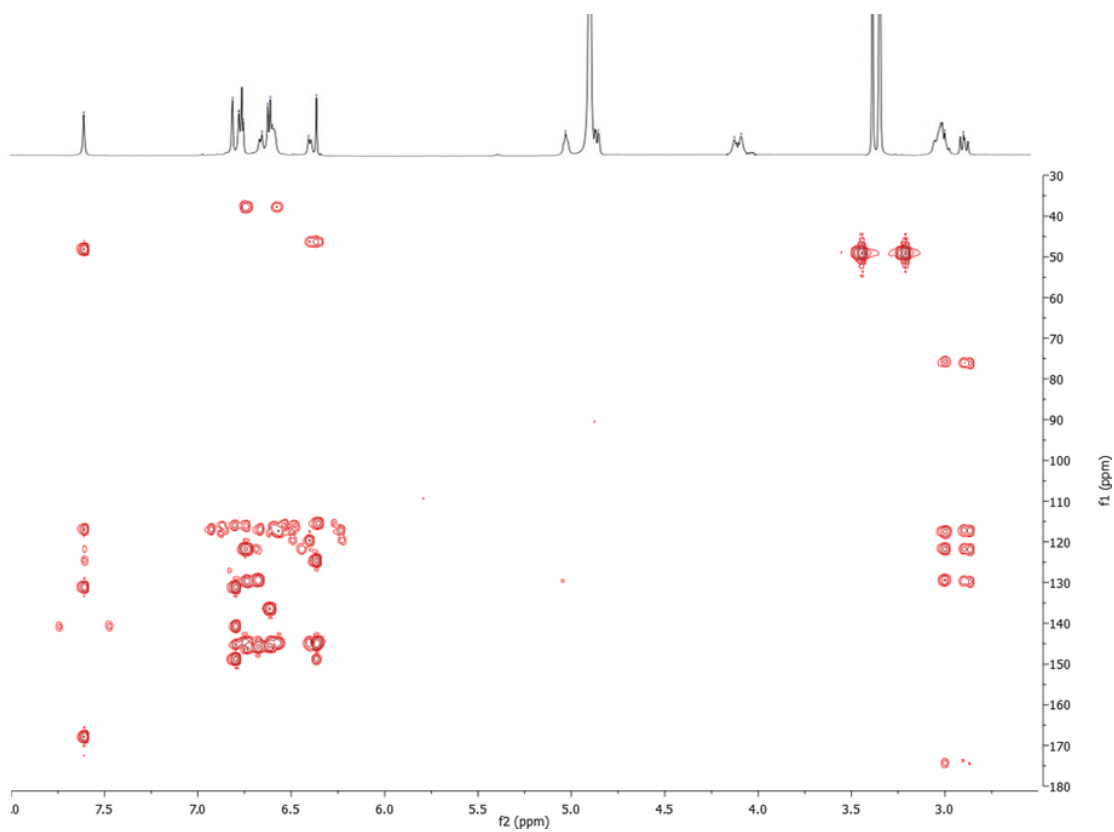

**Figure S14.** HMBC Spectrum ( $\text{CD}_3\text{OD}$ ) of compound **11**

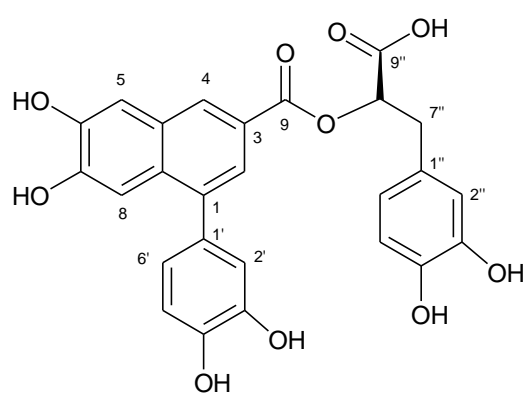

**14**

**Figure S15.** Globoidnan A (**14**)

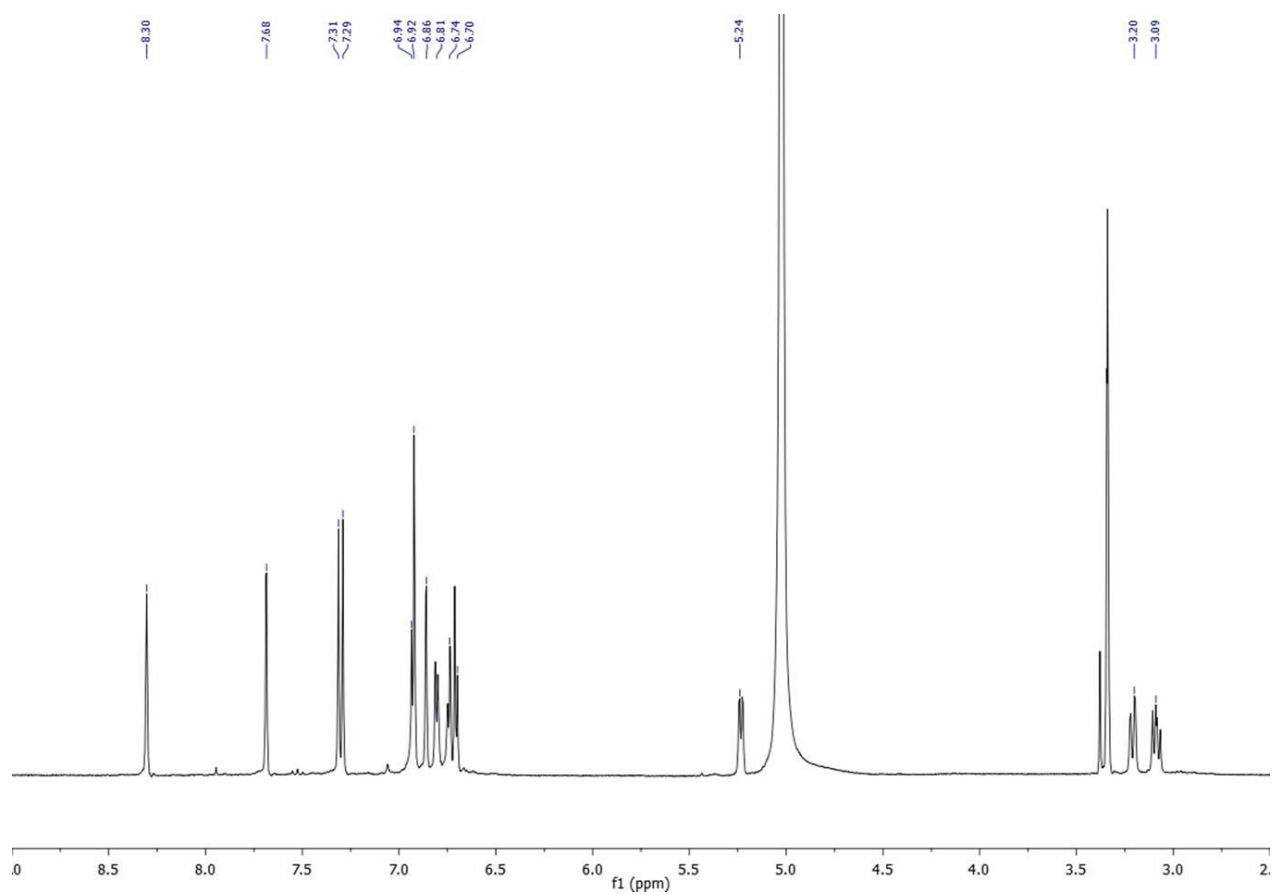

**Figure S16.**  $^1\text{H}$  NMR Spectrum (600 MHz,  $\text{CD}_3\text{OD}$ ) of compound **14**

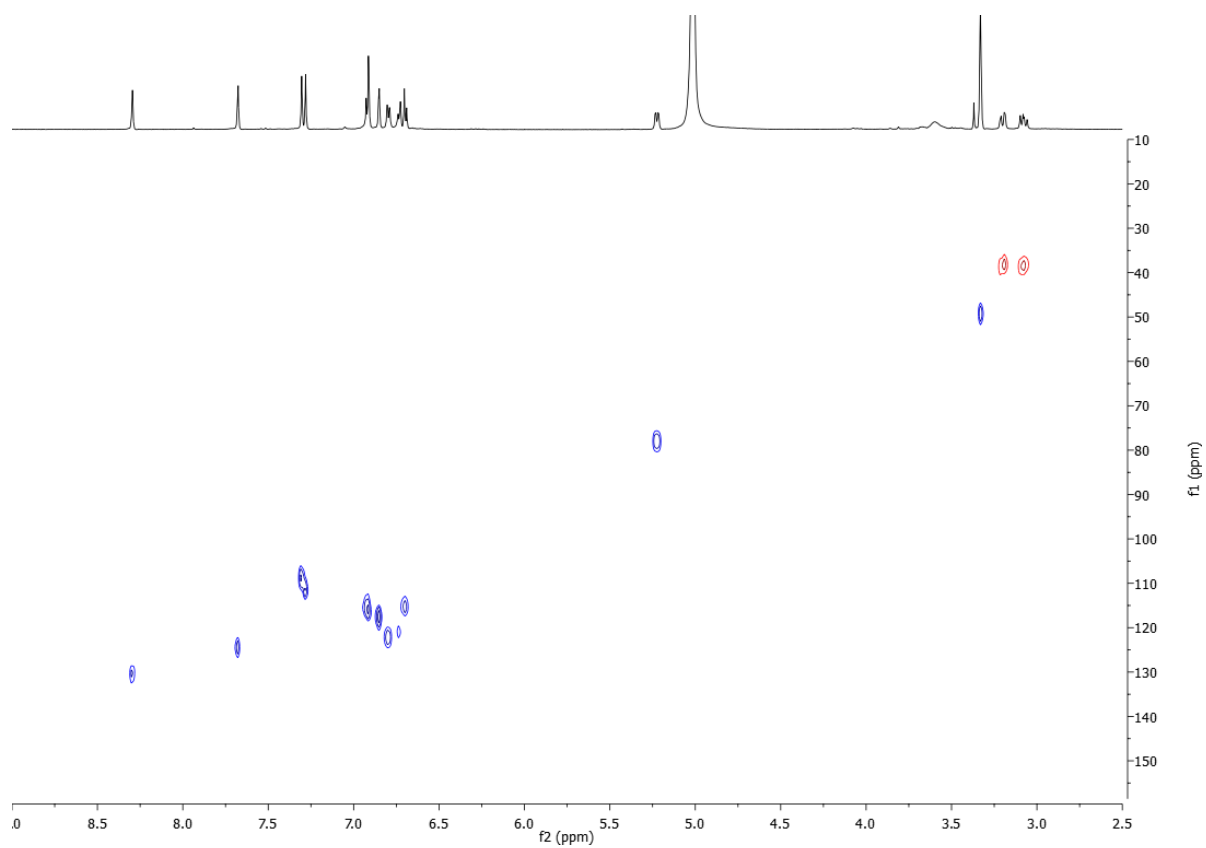

**Figure S17.** HSQC Spectrum (CD<sub>3</sub>OD) of compound **14**

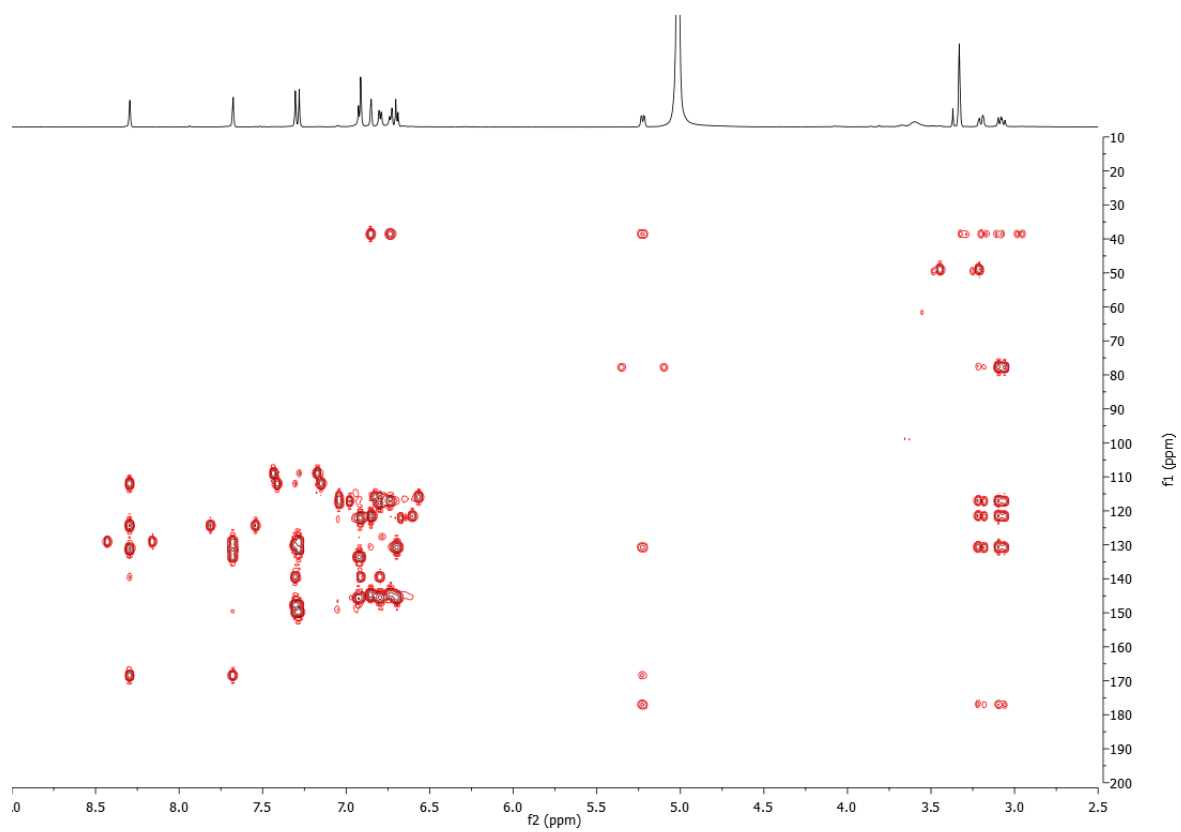

**Figure S18.** HMBC Spectrum (CD<sub>3</sub>OD) of compound **14**

**Table S1.**  $^{13}\text{C}$  and  $^1\text{H}$  NMR data ( $J$  in Hz) of compounds **8**, **11** and **14** (600 MHz,  $\delta$  ppm, in  $\text{CD}_3\text{OD}$ )

|      | <b>8</b>            |                                  | <b>11</b>           |                                  | <b>14</b>           |                                               |
|------|---------------------|----------------------------------|---------------------|----------------------------------|---------------------|-----------------------------------------------|
|      | $\delta_{\text{C}}$ | $\delta_{\text{H}}$ ( $J$ in Hz) | $\delta_{\text{C}}$ | $\delta_{\text{H}}$ ( $J$ in Hz) | $\delta_{\text{C}}$ | $\delta_{\text{H}}$ ( $J$ in Hz)              |
| 1    | 46.4                | 4.43, d (2.6)                    | 46.1                | 4.12, d (2.6)                    | 139.4               | -                                             |
| 2    | 48.3                | 3.87, d (2.6)                    | 47.5                | 4.08, d (2.6)                    | 124.4               | 7.68, d (1.6)                                 |
| 3    | 122.4               | -                                | 121.8               | -                                | 122.3               | -                                             |
| 4    | 140.6               | 7.61, s                          | 140.5               | 7.60, s                          | 130.5               | 8.30, d (1.6)                                 |
| 4a   | 124.6               | -                                | 124.6               | -                                | 129.9               | -                                             |
| 5    | 117.4               | 6.86, s                          | 117.4               | 6.80, s                          | 111.4               | 7.28, s                                       |
| 6    | 145.1               | -                                | 145.1               | -                                | 147.6               | -                                             |
| 7    | 148.7               | -                                | 148.5               | -                                | 149.7               | -                                             |
| 8    | 117.5               | 6.57, s                          | 117.2               | 6.35, s                          | 108.6               | 7.30, s                                       |
| 8a   | 131.0               | -                                | 130.8               | -                                | 131.4               | -                                             |
| 9    | 167.9               | -                                | 168.1               | -                                | 168.5               | -                                             |
| 10   | 175.9               | -                                | 173.4               | -                                | -                   | -                                             |
| 1'   | 135.9               | -                                | 136.2               | -                                | 133.5               | -                                             |
| 2'   | 115.8               | 6.46, d (1.8)                    | 115.8               | 6.60, d (1.8)                    | 116.1               | 6.92, d (1.8)                                 |
| 3'   | 145.5               | -                                | 145.2               | -                                | 145.4               | -                                             |
| 4'   | 144.5               | -                                | 145.5               | -                                | 145.5               | -                                             |
| 5'   | 116.5               | 6.65, d (8.0)                    | 115.8               | 6.64, d (8.0)                    | 115.3               | 6.93, d (8.0)                                 |
| 6'   | 120.0               | 6.41, dd (8.0, 1.8)              | 119.6               | 6.39, dd (8.0, 1.8)              | 122.1               | 6.81, dd (8.0, 1.8)                           |
| 1''  | 129.0               | -                                | 130.8               | -                                | 130.7               | -                                             |
| 2''  | 117.7               | 6.74, d (1.9)                    | 117.1               | 6.77, d (1.9)                    | 117.5               | 6.86, d (1.9)                                 |
| 3''  | 145.7               | -                                | 145.7               | -                                | 144.5               | -                                             |
| 4''  | 144.7               | -                                | 144.8               | -                                | 144.7               | -                                             |
| 5''  | 116.5               | 6.71, d (8.0)                    | 116.3               | 6.74, d (8.0)                    | 115.5               | 6.70, d (8.0)                                 |
| 6''  | 122.2               | 6.57, dd (8.0, 1.9)              | 121.4               | 6.59, dd (8.0, 1.9)              | 121.0               | 6.74, dd (8.0, 1.9)                           |
| 7''  | 37.6                | 3.05 (2H), m                     | 38.2                | 3.02 (2H), m                     | 38.4                | 3.20, dd (3.5, 14.7)<br>3.19, dd (10.3, 14.7) |
| 8''  | 74.9                | 5.24, dd (5.0, 7.3)              | 77.9                | 5.02, dd (5.0, 7.3)              | 77.9                | 5.24, dd (3.5, 10.3)                          |
| 9''  | 173.2               | -                                | 173.8               | -                                | 177.0               | -                                             |
| 1''' |                     |                                  | 130.9               | -                                |                     |                                               |
| 2''' |                     |                                  | 116.3               | 6.61, d (1.9)                    |                     |                                               |
| 3''' |                     |                                  | 145.5               | -                                |                     |                                               |
| 4''' |                     |                                  | 145.2               | -                                |                     |                                               |
| 5''' |                     |                                  | 117.1               | 6.77, d (8.0)                    |                     |                                               |
| 6''' |                     |                                  | 121.4               | 6.59, dd (8.0, 1.9)              |                     |                                               |
| 7''' |                     |                                  | 38.2                | 2.99, 2.89, m                    |                     |                                               |
| 8''' |                     |                                  | 77.7                | 4.84, dd (5.0, 7.3)              |                     |                                               |
| 9''' |                     |                                  | 176.1               | -                                |                     |                                               |
